1 **Title**

2 **MerMAIDs: A novel family of metagenomically discovered, marine, anion-conducting and**  
3 **intensely desensitizing channelrhodopsins.**

4 **Authors**

5 Johannes Oppermann<sup>1</sup>, Paul Fischer<sup>1</sup>, Arita Silapetere<sup>1</sup>, Bernhard Liepe<sup>1</sup>, Silvia Rodriguez-  
6 Rozada<sup>2</sup>, José Flores-Uribe<sup>3,4</sup>, Enrico Peter<sup>1</sup>, Anke Keidel<sup>5</sup>, Johannes Vierock<sup>1</sup>, Joel Kaufmann<sup>6</sup>,  
7 Matthias Broser<sup>1</sup>, Meike Luck<sup>1</sup>, Franz Bartl<sup>6</sup>, Peter Hildebrandt<sup>5</sup>, J. Simon Wiegert<sup>2</sup>, Oded Béjà<sup>3</sup>,  
8 Peter Hegemann<sup>1\*</sup>, & Jonas Wietek<sup>1\*</sup>

9 <sup>1</sup>Institute for Biology, Experimental Biophysics, Humboldt-Universität zu Berlin, Invalidenstraße  
10 42, 10115 Berlin, Germany

11 <sup>2</sup>Research Group Synaptic Wiring and Information Processing, Center for Molecular Neurobiology  
12 Hamburg, Falkenried 94, 20251, Hamburg, Germany

13 <sup>3</sup>Faculty of Biology, Technion – Israel Institute of Technology, Haifa 32000, Israel

14 <sup>4</sup>Department of Plant Microbe Interactions, Max Planck Institute for Plant Breeding Research,  
15 Cologne 50829, Germany

16 <sup>5</sup>Institute for Chemistry, Physical Chemistry / Biophysical Chemistry, Technische Universität  
17 Berlin, Straße des 17. Juni 135, 10623, Berlin Germany

18 <sup>6</sup>Institute for Biology, Biophysical Chemistry, Humboldt-Universität zu Berlin, Invalidenstraße 42,  
19 10115 Berlin, Germany

20 \*Corresponding authors. Email: [hegemann@rz.hu-berlin.de](mailto:hegemann@rz.hu-berlin.de) (P.H.); [jonaswietek@gmail.com](mailto:jonaswietek@gmail.com)  
21 (J.W.)

## 22 **Abstract**

23 Channelrhodopsins (ChRs) are algal light-gated ion channels widely used as optogenetic tools for  
24 manipulating neuronal activity. ChRs desensitize under continuous bright-light illumination,  
25 resulting in a significant decline of photocurrents. We describe a novel, metagenomically identified  
26 family of phylogenetically distinct anion-conducting ChRs (designated MerMAIDs). MerMAIDs  
27 almost completely desensitize during continuous illumination due to accumulation of a late non-  
28 conducting photointermediate that disrupts the ion permeation pathway. MerMAID desensitization  
29 can be fully explained by a single photocycle in which a long-lived desensitized state follows the  
30 short-lived conducting state. A conserved cysteine is the critical factor in desensitization, as its  
31 mutation results in recovery of large stationary photocurrents. The rapid desensitization of  
32 MerMAIDs enables their use as optogenetic silencers for transient suppression of individual action  
33 potentials without affecting subsequent spiking during continuous illumination. Our results could  
34 facilitate the development of further novel optogenetic tools from metagenomic databases and  
35 enhance general understanding of ChR function.

36 Channelrhodopsins (ChRs) are members of the microbial rhodopsin family that directly translate  
37 absorbed light into ion fluxes along electrochemical gradients across cellular membranes by  
38 opening a conductive pore<sup>1-3</sup>. ChRs are composed of seven transmembrane helices and an  
39 embedded retinal cofactor linked to a conserved lysine in helix 7 via a Schiff base (retinal Schiff  
40 base, RSB). Upon photon absorption, the RSB isomerizes from all-*trans* to 13-*cis*, which induces  
41 structural changes, collectively described as spectroscopically distinguishable intermediates in a  
42 photocycle<sup>4</sup>.

43 In response to extended light pulses, the photocurrents of most known ChRs decline from an initial  
44 peak current to a lower, stationary level, a phenomenon known as desensitization (also termed  
45 inactivation)<sup>2,4-6</sup>. The degree and kinetics of desensitization differ among ChRs and depend on  
46 pH, membrane voltage as well as light intensity and color, with typically  $\leq 70\%$  amplitude  
47 reduction<sup>1,2,7</sup>. Photocurrent decrease via desensitization has been explained by accumulation of  
48 late non-conducting photocycle intermediates and by an alternative photocycle exhibiting low  
49 cation conductance<sup>7-10</sup>.

50 During the past fourteen years, cation-conducting ChRs (CCRs) were widely employed to  
51 depolarize genetically targeted neurons or neuronal networks using light to trigger action-potential  
52 firing<sup>11-15</sup>. Originally, light-driven microbial ion pumps were utilized to suppress neuronal activity  
53 by hyperpolarization<sup>16,17</sup>. Since ion pumps always transport one ion per absorbed photon, efficient  
54 neuronal silencing required high ion pump expression levels and continuous, intense illumination.  
55 This disadvantage was overcome by converting CCRs into anion-conducting ChRs (ACRs)<sup>18-21</sup>.  
56 Such engineered ACRs (eACRs)<sup>22</sup> and later-discovered natural ACRs (nACRs)<sup>23-26</sup> silence  
57 neuronal activity by light-induced shunting-inhibition, similar to endogenous GABA- or glycine-  
58 activated chloride channels<sup>22,27-30</sup>.

59 Here, we report a new family of phylogenetically distinct ChRs metagenomically identified from  
60 marine microorganisms. These ChRs conduct anions but exhibit unique desensitization in

61 continuous light and were therefore designated MerMAIDs (Metagenomically discovered, Marine,  
 62 Anion-conducting and Intensely Desensitizing ChRs). Seven MerMAIDs were characterized  
 63 biophysically via electrophysiological recordings, and we elucidated the molecular mechanism of  
 64 the first accessible MerMAIDs using spectroscopic analyses and molecular dynamic (MD)  
 65 calculations. We also explore the optogenetic inhibitory potential in neurons.

## 66 Results

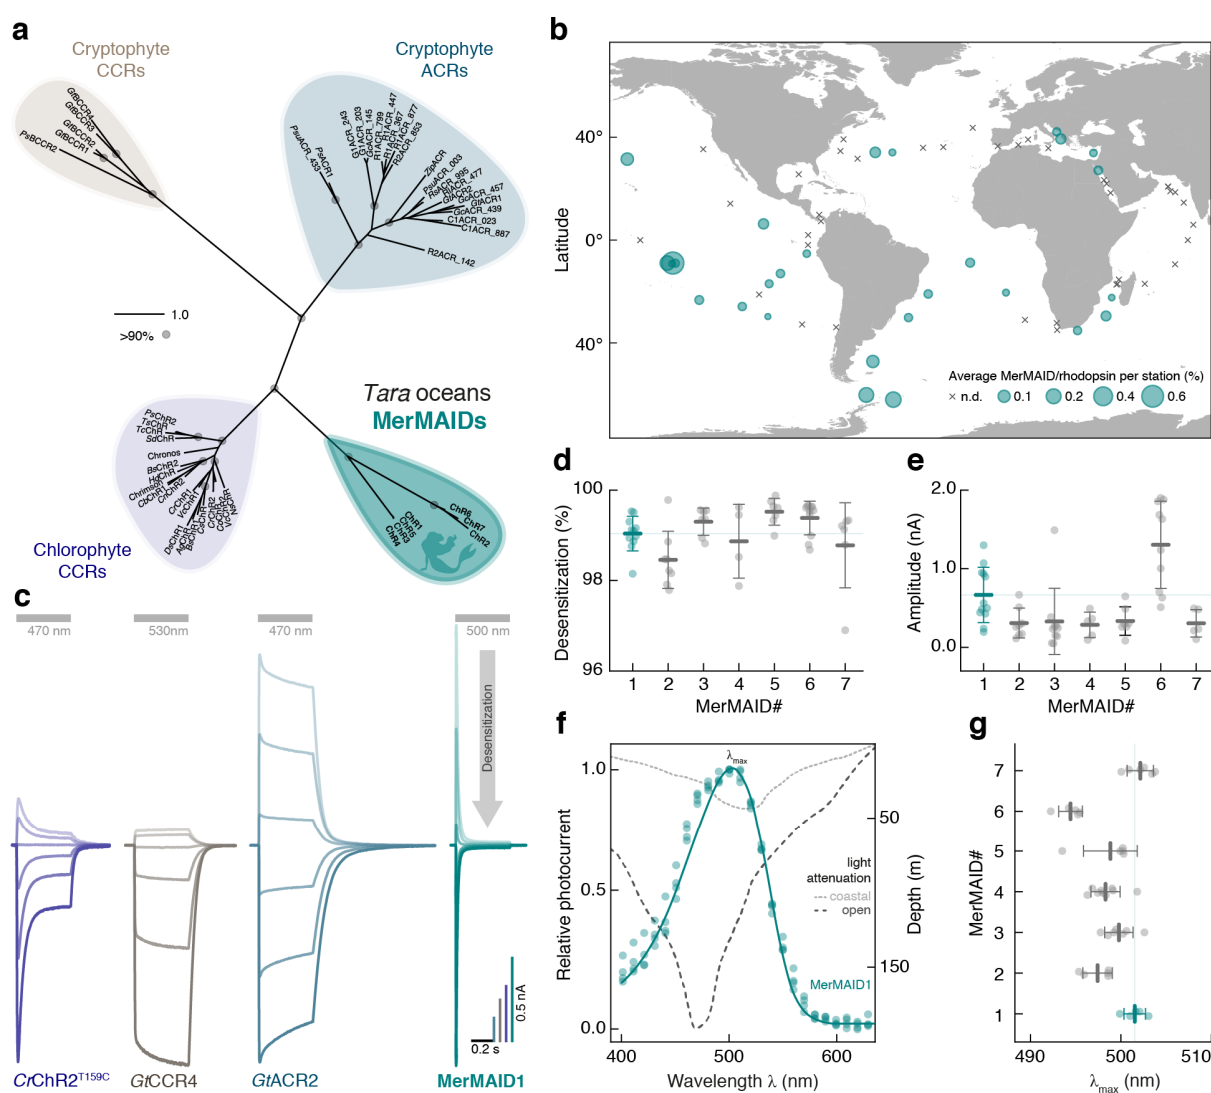

67  
 68 **Fig. 1 | Discovery and electrophysiological features of MerMAIDs.** a, Unrooted phylogenetic  
 69 tree of the channelrhodopsin superfamily, with grey circles representing bootstrap values >90%.  
 70 Scale bar indicates the average number of amino acid substitutions per site. CCR, cation-

71 conducting channelrhodopsin; ACR, anion-conducting channelrhodopsin. **b**, Distribution and  
72 relative abundance of MerMAIDs in samples from the *Tara* Oceans project. Area of each circle  
73 indicate the estimated average abundance of MerMAID-like rhodopsins at different *Tara* Oceans  
74 stations. Stations where MerMAIDs were not detected (n.d.) are indicated by crosses. **c**,  
75 Photocurrent traces of representative members of previously identified ChR families and  
76 MerMAIDs, recorded from -60 to +40 mV in steps of 20 or 15 mV (GtCCR4). Grey bars indicate  
77 light application at denoted wavelengths. **d**, **e**, Desensitization (**d**) and peak current amplitudes  
78 (**e**) of all MerMAIDs at -60 mV during continuous illumination with 500 nm light. **f**, Normalized  
79 action spectrum of MerMAID1. Single measurements are shown as dots (n=4), and solid line  
80 represents fitted data. Dashed lines indicate light penetration depth in coastal and open seawater  
81 (adopted from ref.<sup>86</sup>).  $\lambda_{\max}$ , maximum response wavelength; **g**,  $\lambda_{\max}$  for all MerMAIDs. Mean values  
82 (thick lines)  $\pm$  standard deviation (whiskers) are shown, and single-measurement data points are  
83 represented as dots.

84 Seven putative ChRs constituting a new distinct phylogenetic branch in the ChR superfamily were  
85 identified in contigs assembled from the *Tara* Oceans metagenomes (MerMAIDs in Fig. 1a).  
86 However, the shortness of the assemblies (<10 kb) precluded taxonomic classification of the  
87 contigs. These MerMAIDs appeared to be globally distributed in the oceans, most abundant at  
88 stations near the equatorial Pacific and South Atlantic Oceans (Fig. 1b). The MerMAIDs were  
89 primarily constrained to the photic zone (depth, 0–200 m), as previously reported for other  
90 rhodopsins<sup>31</sup> (Fig. S1).

91 Phylogenetically, the MerMAIDs appear more closely related to chlorophyte CCRs than  
92 cryptophyte ACRs (Fig. 1a). However, sequence comparisons indicated that MerMAIDs might be  
93 anion-conducting due to the lack of typical glutamate residues found in chlorophyte CCRs, though  
94 also missing in cryptophyte CCRs (Fig. S2). To examine their function, we expressed MerMAIDs  
95 in human embryonic kidney (HEK) cells and performed whole-cell voltage-clamp experiments at  
96 1-day post transfection.

97 When excited with 500-nm light, MerMAID-expressing cells exhibited large photocurrents but in  
98 contrast to all previously analyzed ChRs (Fig. 1c), MerMAIDs reveal almost complete  
99 desensitization with continuous, bright light exposure (Figs. 1c,d and S3a,b). Maximum peak  
100 photocurrent amplitudes reached up to 2 nA (MerMAID-6, Figs. 1e and S3c), but the current did

101 not saturate even at 10 mW/mm<sup>2</sup> (Fig. S3d). Transient photocurrent action spectra were recorded  
 102 to determine the wavelength sensitivity of the MerMAIDs. All variants tested exhibited typical  
 103 rhodopsin spectra, with maximal sensitivity close to 500 nm (Figs. 1f,g and S3e), as expected for  
 104 marine organisms, given that blue light penetration is strongest within the photic zone in seawater  
 105 (Fig. 1f).

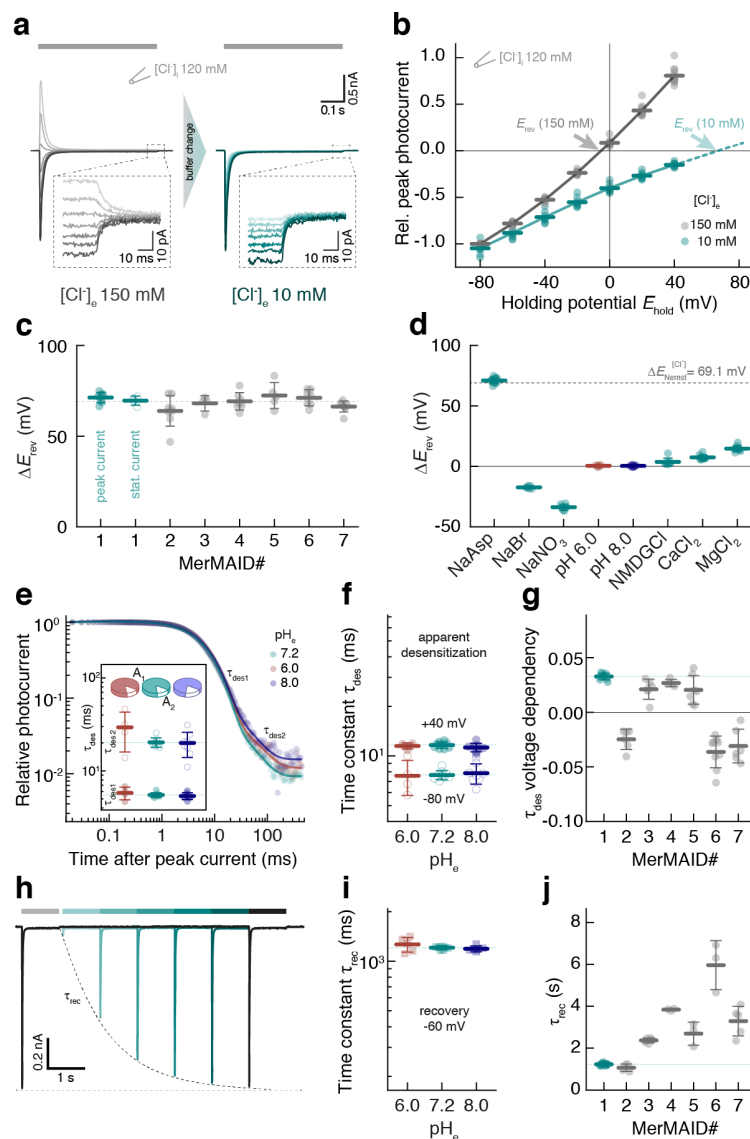

106  
 107 **Fig. 2 | Ion selectivity and kinetic properties of MerMAIDs.** a, Representative photocurrent  
 108 traces of MerMAID1 elicited with 500 nm light (grey bar) at different holding potentials (−80 to  
 109 +40 mV, in 20-mV steps, from bottom to top) before (left, grey) and after extracellular chloride  
 110 reduction (right, cyan), as indicated. Insets show enlarged views of the remaining stationary

111 photocurrent. **b**, Current-voltage relationship of the MerMAID1 peak photocurrent at 150 mM  
112 (grey) and 10 mM (cyan) extracellular chloride ( $[Cl^-]_e$ ). Arrows indicate reversal potentials ( $E_{rev}$ ).  
113 **c**, Reversal potential shifts ( $\Delta E_{rev}$ ) upon reduction of  $[Cl^-]_e$  for peak currents of all MerMAIDs as  
114 well as the stationary current of MerMAID1. **d**,  $\Delta E_{rev}$  values of MerMAID1 upon exchange of  
115 external buffer.  $\Delta E_{rev}$  of the theoretical Nernst potential for  $Cl^-$  is indicated as a dashed line (**c**, **d**).  
116 **e**, Extracellular pH ( $pH_e$ ) dependence of biphasic MerMAID1 desensitization kinetic. Inset shows  
117 the time constants and their relative amplitudes to total decay. **f**,  $pH_e$  dependency of the apparent  
118 desensitization time constant ( $\tau_{des}$ ) at  $-80$  and  $+40$  mV. **g**, Voltage dependency of  $\tau_{des}$  for all  
119 MerMAIDs in ms/mV. **h**, Double-light pulse experiment at  $-60$  mV and  $pH_e$  7.2 to determine the  
120 peak current recovery time constant ( $\tau_{rec}$ ). **i**,  $pH_e$  dependency of MerMAID1 at  $-60$  mV. **j**, Recovery  
121 time constants of all MerMAID variants. Mean values (thick lines)  $\pm$  standard deviation (whiskers)  
122 are shown, and single-measurement data points are represented as dots.

123 Next, we tested the ion selectivity of the MerMAIDs. Because we suspected anion selectivity, we  
124 depleted the extracellular  $Cl^-$  from 150 mM to 10 mM while maintaining the intracellular  $Cl^-$  at  
125 120 mM (Fig. 2a). This increased the inward current and induced an upshift of the reversal  
126 potential (Fig. 2a,b), consistent with a  $Cl^-$  efflux. A similar shift close to the calculated  $Cl^-$ -Nernst  
127 potential was obtained for all MerMAIDs (Figs. 2c and S4a), as well as for the small stationary  
128 photocurrents of MerMAID1 (Figs. 2a,c and S4a). These data justified the classification of  
129 MerMAIDs as ACRs.

130 To evaluate the conductance of other anions, we performed ion substitution experiments using  
131 MerMAID1 as a model. Replacement of  $Cl^-$  with  $Br^-$  or  $NO_3^-$  resulted in negative reversal potential  
132 shifts (Figs. 2d and S4b), thus revealing nonselective anion conductivity, as previously reported  
133 for other ACRs<sup>21,23</sup>. In contrast, substitution of  $Na^+$  with NMDG<sup>+</sup>,  $Ca^{2+}$ , or  $Mg^{2+}$  had only a slight  
134 effect on reversal potentials (Fig. 2d and S4b), thereby excluding a substantial contribution by  
135 cations as charge carriers.

136 Rhodopsin function often commonly involves de- and reprotonation of internal amino acids, and  
137 pH changes can significantly affect photocurrent amplitude and kinetics<sup>4,9,18,19</sup>. We therefore  
138 investigated the effect of extra- and intracellular pH ( $pH_e$  and  $pH_i$ ) changes on MerMAID1.  
139 Variation of  $pH_e$  between 6.0 and 8.0 slightly altered the photocurrent amplitude (Fig. S4c) but not  
140 the reversal potential (Figs. 2d and S4d), thus excluding proton transport. Neither  $pH_i$  nor  $pH_e$

141 affected the desensitization time constant,  $\tau_{des}$  (Figs. 2e,f and S4e-g). However,  $\tau_{des}$  exhibit a  
142 moderate voltage dependence (Figs. 2f,g and S4e,f). For MerMAID1,3-5, desensitization slowed  
143 down with increasing holding potential whereas  $\tau_{des}$  was accelerated for MerMAIDs 2, 6, and 7  
144 (Fig. 2g). These groups correlated well with the two phylogenetic branches within the MerMAID  
145 family (Fig. 1a), although the underlying molecular determinants of this difference remain  
146 unknown.

147 To assess the photocycle turnover time (recovery kinetic time constant,  $\tau_{rec}$ ), we performed  
148 double-pulse measurements at  $-60$  mV (Fig. 2h) at different  $pH_e$  values. The peak current  
149 recovered with  $\tau_{rec}=1.21 \pm 0.03$  s for MerMAID1, and was unaffected by  $pH_e$  or  $pH_i$  changes  
150 (Figs. 2i,j and S4h,i). Between the different MerMAIDs,  $\tau_{rec}$  varied between  $1.1 \pm 0.2$  s  
151 (MerMAID2) and  $6 \pm 1$  s (MerMAID6, Figs. 2j, and S4i).

152 To elucidate the desensitization mechanism, recombinant MerMAID1 was purified from *Pichia*  
153 *pastoris* and analyzed by UV/vis and vibrational spectroscopy. Steady-state UV/vis absorption  
154 spectra of dark-adapted MerMAID1 exhibited a prominent peak at 502 nm, consistent with the  
155 photocurrent action spectra (Fig. 3a). Upon continuous illumination with green light, the 502-nm  
156 dark-state absorption peak decreased, while a fine-structured, blue-shifted intermediate with sub-  
157 maxima at 346, 364, and 384 nm accumulated in parallel (Fig. 3a,d). Similarly, alkalization  
158 converted dark-adapted MerMAID1 into a more red-shifted, fine-structured UV-absorbing species,  
159 consistent with a deprotonated 13-*cis* isomer in the M-state and deprotonated all-*trans* RSB dark  
160 state<sup>32</sup> that occurs with a pK value of approximately 9.8 (Figs. 3b,d and S5d).



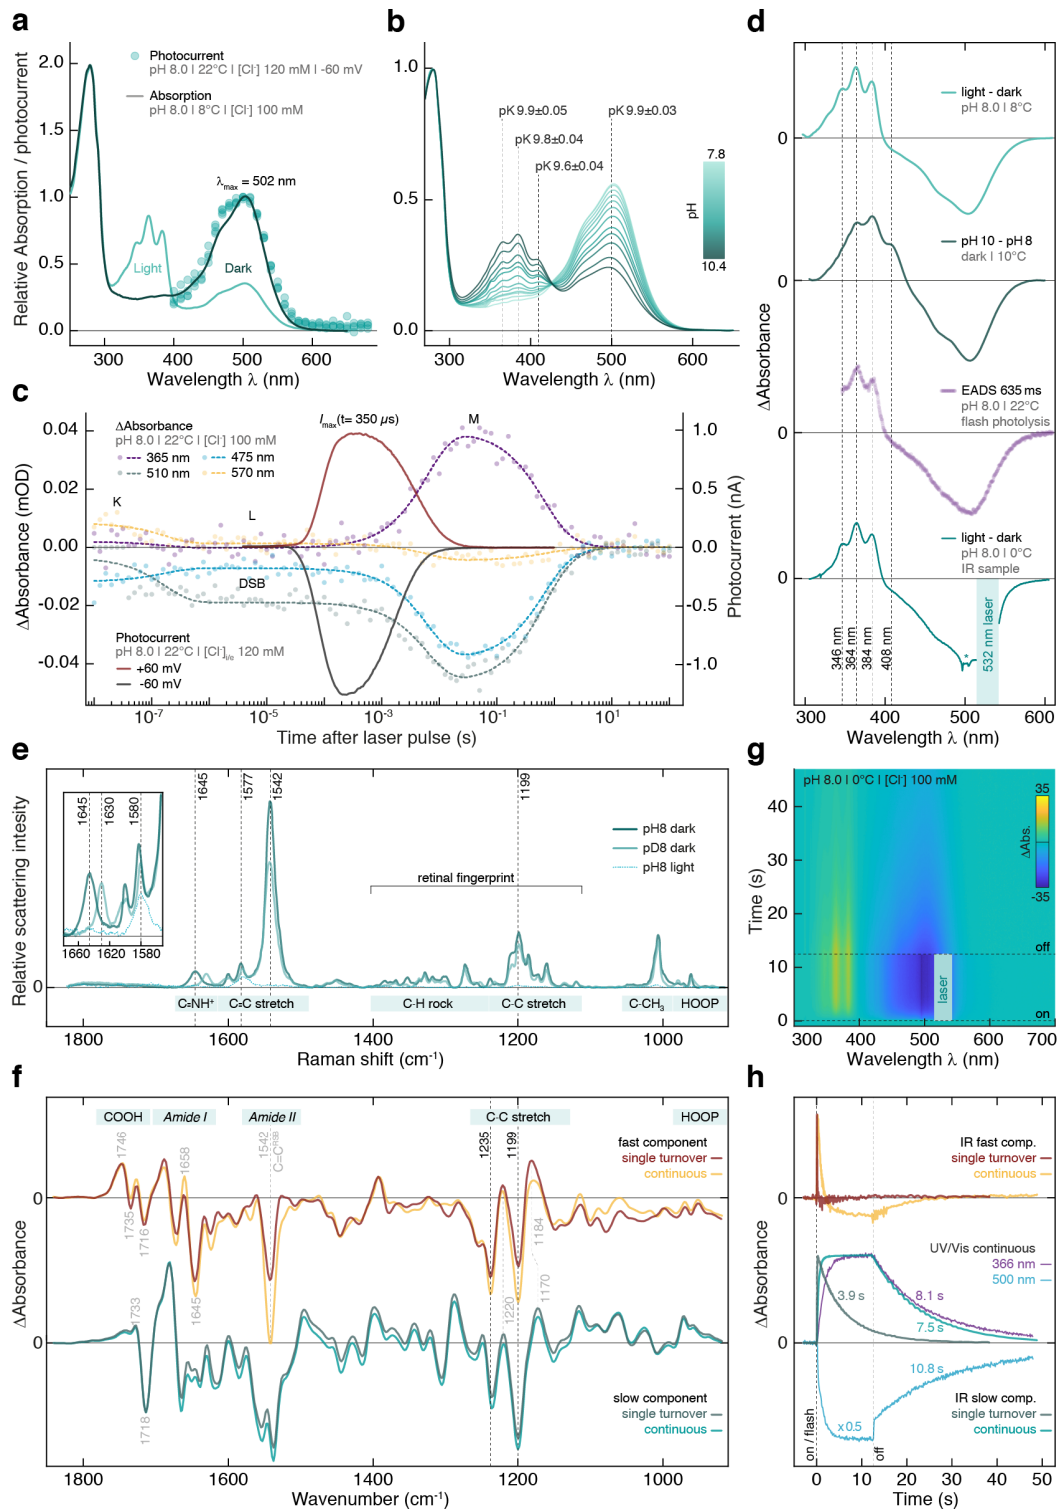

161

162 **Fig. 3 | Spectroscopic characterization of purified MerMAID1.** **a**, Normalized UV/vis absorption  
 163 spectra of dark-adapted and illuminated MerMAID1. Filled circles indicate single-measurement  
 164 action spectra recordings, as shown in Figure 1f. **b**, Normalized UV/vis absorption spectra of

165 MerMAID1 at different pH values, titrated from pH 7.8 to 10.4. The pK values for specific  
166 wavelengths are indicated. **c**, Transient absorption changes and electrophysiological recordings  
167 obtained with single-turnover laser pulse excitation. **d**, Fine-structured difference absorption  
168 spectra obtained from different experiments. (From top to bottom) light minus dark difference  
169 spectra obtained from data shown in panel a, pH-difference spectra calculated from panel b data,  
170 evolution-associated difference spectra (EADS) resulting from a global fit of the transient  
171 absorption spectra and (bottom) light-minus-dark difference spectrum measured using the FTIR  
172 sample shown in (**g**). Due to strong laser scattering, a portion of the spectral data is excluded for  
173 the FTIR sample, and residual scattering is marked with an asterisk. **e**, Resonance Raman spectra  
174 of dark-adapted MerMAID1 at pH/D 8 (recorded at 488 nm) as well as cryo-trapped and  
175 illuminated protein sample at pH 8 (recorded at 413 nm). Inset: zoomed C=NH<sup>+</sup> stretching region.  
176 **f**, Kinetically decomposed FTIR light-minus-dark absorption of MerMAID1, recorded with single  
177 turnover and continuous illumination at 0°C. Bands marked in grey are discussed in the  
178 Supplementary Material **g**, Contour plot of transient absorption changes of the sample used in (**f**)  
179 illuminated with a 532 nm continuous laser. **h**, Decay kinetics of the fast and slow FTIR  
180 components obtained under single-turnover and continuous illumination conditions, respectively.  
181 Kinetics at 366 and 500 nm obtained from the UV/vis spectroscopic measurements shown in (**g**)  
182 are shown for comparison.

183 Single-turnover voltage-clamp experiments showed a maximum channel conductance 350  $\mu$ s  
184 after ns-pulse laser excitation. Channel closing was biphasic, with a dominant fast component and  
185 an apparent closing time constant ( $\tau_{\text{off}}$ ) of  $2.7 \pm 0.1$  ms (Figs. 3c and S5a). Transient UV/vis  
186 absorption spectra (Figs. 3c and S5b,c) revealed an early decaying (173 ns) K-like photoproduct  
187 observed only briefly on our time scale. The evolution-associated difference spectrum (EADS) of  
188 the subsequent L-intermediate is slightly blue shifted and to some extent broadened compared to  
189 the dark-state spectrum (Fig. S5c), indicating closer proximity of the primary counterion to the  
190 RSBH<sup>+</sup> immediately prior to RSB deprotonation<sup>33</sup>. Within 6 ms, the L-state converted to the M-  
191 state, with concomitant deprotonation of the RSB, as indicated by the large blue shift coinciding  
192 with channel closure (Figs. 3c and S5a,b). The transient M-state EADS was similarly fine-  
193 structured as observed for continuous photo activation (Fig. 3d), indicating accumulation of the M-  
194 state during sustained light exposure.

195 To assess potential retinal chromophore isoforms of MerMAID1, we performed resonance Raman  
196 (RR) spectroscopy at 80 K. Excitation of dark-adapted MerMAID1 at 488 or 514 nm produced  
197 identical RR spectra (Fig. S5e), indicating structural homogeneity of the chromophore. The

198 vibrational band pattern in the retinal fingerprint region (1100–1400  $\text{cm}^{-1}$ ) was characteristic of an  
199 *all-trans* RSB<sup>34,35</sup> (Fig. 3e). Upon proton/deuterium exchange, the C=N stretching mode  
200 downshifted from 1645 to 1630  $\text{cm}^{-1}$  (inset Fig. 3e), indicative of a weakly hydrogen-bonded<sup>36</sup>  
201 protonated RSB<sup>34,35</sup>. RR spectra of photoactivated MerMAID1 cryo-trapped in the M-state and  
202 excited at 413 nm exhibited a prominent band at 1577  $\text{cm}^{-1}$  attributable to a 13-*cis* configuration  
203 of the chromophore with deprotonated RSB<sup>37</sup>. RR spectra of dark-adapted MerMAID1 probed with  
204 488 or 413 nm at pH 10 were similar to spectra of dark- and light-adapted MerMAID1 at pH 8 (Fig.  
205 S5e). Notably, strong bands in the C=C stretching region at ca. 1540 and 1577  $\text{cm}^{-1}$  indicated a  
206 mixture of two chromophore isomers, corresponding to the protonated and deprotonated *all-trans*  
207 RSB of the dark state at high pH. Thus, RR spectra confirmed that MerMAID1 undergoes *all-trans*  
208 to 13-*cis* retinal isomerization and deprotonation of the RSB during illumination and may  
209 deprotonate at high pH in the dark.

210 Time-resolved Fourier-transform infrared (FTIR) spectra were collected at pH 8.0 and 0 °C to  
211 examine the light-driven molecular processes of MerMAID1 under single-turnover conditions and  
212 continuous illumination (Fig. 3f,h), with parallel UV/vis observation of M-state formation (Fig. 3g,  
213 h). Kinetic decomposition of light-dark FTIR difference spectra revealed highly similar fast and  
214 slow spectral components for both single-turnover and continuous illumination, respectively  
215 (Fig. 3f). At both conditions, the slow FTIR component relaxed to the dark state mono-  
216 exponentially, within seconds (Fig. 3h) and was assigned to the late M-state that accumulated with  
217 continuous illumination (Fig. 3g,h) without formation of other photoproducts. This assignment was  
218 supported by data for the retinal fingerprint region that—similar to the RR data—indicated *all-trans*  
219 to 13-*cis* retinal isomerization as the only photoreaction based on the negative bands at 1235(-)  
220 and 1199(-)  $\text{cm}^{-1}$ . The fast FTIR spectral components resembled the short-lived conducting L-  
221 state preceding the late M-intermediate, as inferred from the comparable decay kinetics (see  
222 Supplemental Discussion).

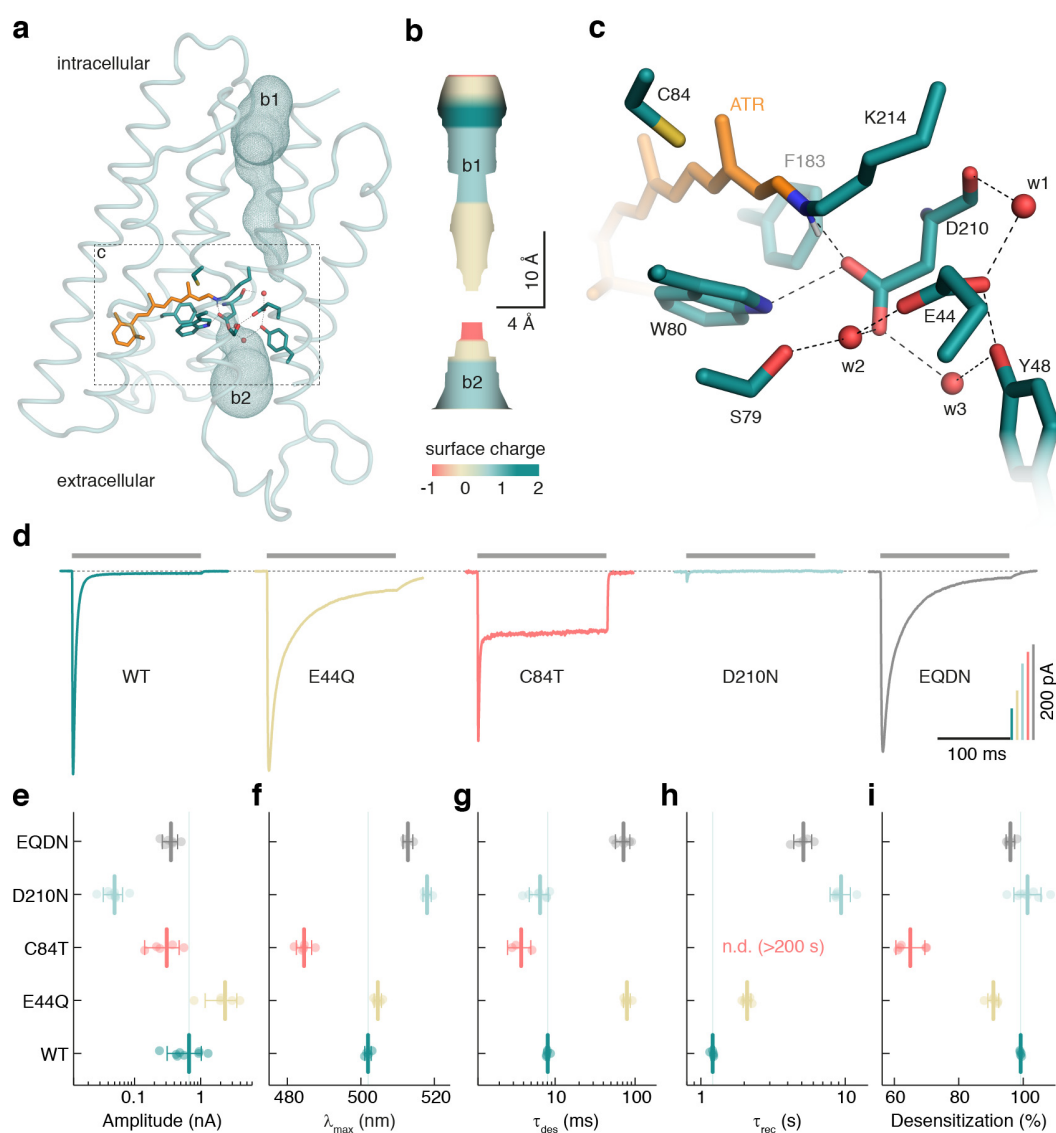

223

224 **Fig. 4 | MD simulations and mutational analysis of MerMAID1.** **a**, Overview of the MD  
 225 simulation homology model of MerMAID1 in the dark. The predicted ion permeation pathway is  
 226 shown as mesh (b1, b2), and ribbons represent the protein backbone. **b**, Electrostatic surface  
 227 potential of the predicted chloride permeation pathway. **c**, Detailed view of the active-site residues,  
 228 with amino acids shown as cyan sticks and the all-*trans* retinal (ATR) in orange. Red spheres  
 229 denote water molecules that remained stable during MD simulation. **d**, Representative  
 230 photocurrent traces of wild-type (WT) MerMAID1 and selected MerMAID1 mutants recorded at  
 231  $-60$  mV. Photocurrent amplitudes (**e**),  $\lambda_{\max}$  (**f**), apparent  $\tau_{\text{des}}$  of the peak current (**g**),  
 232 recovery time constant,  $\tau_{\text{rec}}$  (**h**), and extent of desensitization (**i**) of WT MerMAID1 and indicated mutants. Mean  
 233 values (thick lines)  $\pm$  standard deviation (whiskers) are shown, and single-measurement data  
 234 points are represented as dots.

235 Site-directed mutagenesis guided by MD simulations and probed by electrophysiological  
236 recordings were conducted to further examine the molecular mechanism for the intense  
237 desensitization of the MerMAIDs. For MD simulations, a MerMAID1 homology model was  
238 constructed based on the iC++ crystal structure<sup>38</sup> and embedded in a phospholipid bilayer (Figs.  
239 4a and S6a). The D210, E44, W80, and Y48 side chains located near the protonated Schiff base  
240 (Fig. 4a,c) maintained their relative positions during a 100-ns MD simulation. The orientation and  
241 distances of these residues changed only slightly with inflowing water (Fig. S6d-f). Possible ion  
242 translocation pathways were calculated using MOLEonline<sup>39</sup>. Figure 4a,b shows the most likely  
243 ion pathway based on surface charge considerations (Fig. S6b,c). Extracellularly, MerMAID1 is  
244 accessible via a narrowing tunnel that is disrupted by W80, D210, and the RSB (Fig. 4a,b).  
245 Intracellularly, another ion pathway is formed leading from the protein surface almost to the Schiff  
246 base, disconnected only by a short hydrophobic barrier. In our model, the carboxylic residues of  
247 the active site complex (E44 and D210) were deprotonated based on pK<sub>a</sub> calculations (Fig. 4c,  
248 pK<sub>a</sub> <5.5). D210, which acts as closest counterion (2.6 Å) to the Schiff base nitrogen, primarily  
249 stabilizes the RSB proton (Fig. 4c). The carboxyl group of D210 also interacts with S79, Y48, and  
250 E44 via two water molecules, whereas E44 hydrogen bonds directly to Y48 and is linked to the  
251 backbone oxygen of D210 via another water molecule (Fig. 4c). When the counterion D210 is  
252 neutralized (D210N), photocurrents are drastically reduced (Fig. 4d,e),  $\lambda_{\max}$  was 16 nm red-shifted  
253 (Fig. 4f), and the recovery kinetics decelerated markedly (Fig. 4h). Elimination of the more distant  
254 E44 via an E44Q mutation caused only a 3 nm bathochromic action-spectrum shift (Fig. 4f),  
255 increased the photocurrent amplitudes (Fig. 4f), decelerated desensitization by a factor of 10  
256 (Fig. 4d,g) and slightly reduced the extent of desensitization (Fig. 4i). Replacement of both acidic  
257 residues (E44Q-D210N) only halved photocurrent amplitudes (Fig. 4e) and shifted  $\lambda_{\max}$  to  
258  $513 \pm 1$  nm (Fig. 4f), suggesting rearrangement of the hydrogen bond network around the RSB.  
259 Desensitization remained strong (Fig. 4i), but the kinetics slowed, similar to the E44Q mutation  
260 alone (Fig. 4g).

261 Neutralization of E44 increased the stationary current only slightly (Fig. 4i), whereas we identified  
262 C84 (the *CrChR2* C128 homolog) as a crucial determinant of the inactivation process. The C84T  
263 mutant exhibited a decreased peak current amplitude but markedly increased stationary  
264 photocurrent (Fig. 4d,e), resulting in only  $65 \pm 5$  % desensitization (Fig. 4d,i) and minimally altered  
265 desensitization kinetics (Fig. 4d,g). In contrast, we observed no peak current recovery within a  
266 time period of 200 s. As suggested by our model structure and the pronounced 17 nm blue-shifted  
267  $\lambda_{\max}$  (Fig. 4f), C84 is located near the retinal polyene chain and the C13 methyl group (Fig. 4a,c).  
268 In MerMAIDs, this cysteine cannot serve as a link between helices 3 and 4 as discussed for  
269 bacteriorhodopsin<sup>40,41</sup> and CCRs<sup>42,43</sup> due to the absence of a hydrogen-bonding partner in helix 4  
270 (Fig. S2). C84 might stabilize the deprotonated RSB within the anion permeation pathway instead,  
271 thereby disrupting further ion conduction via charge repulsion of the deprotonated RSB during the  
272 photocycle.

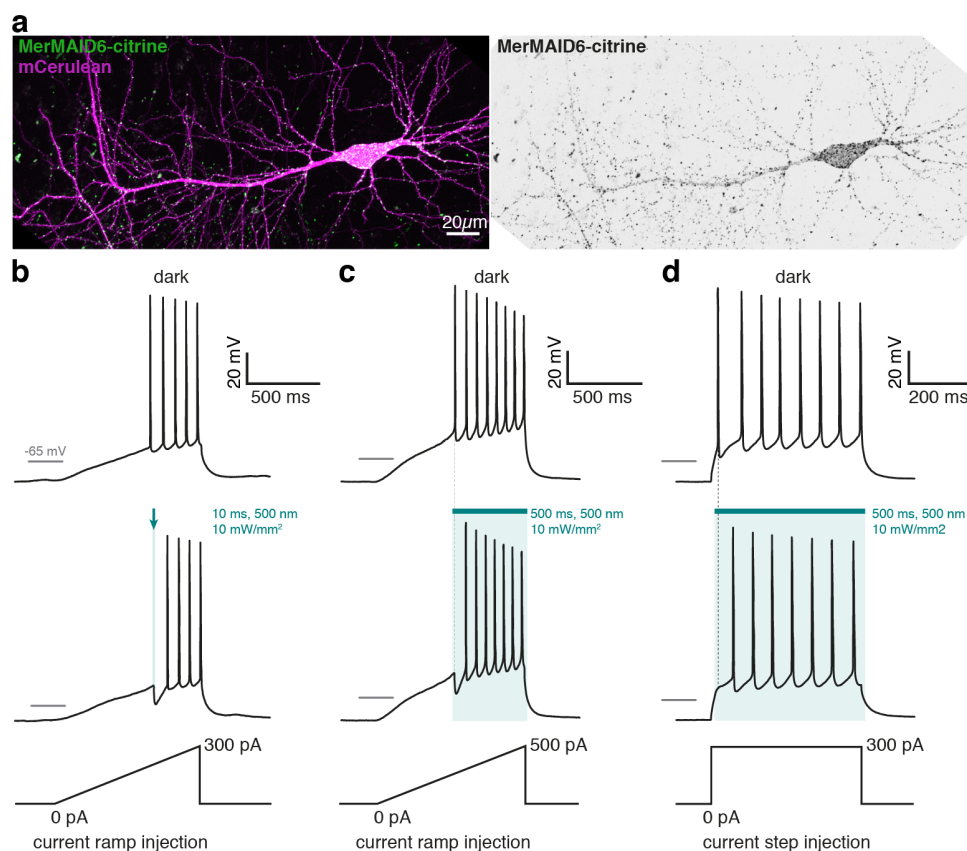

273

274 **Fig. 5 | Neuronal application of MerMAID6 as optogenetic silencer.** **a**, CA1 pyramidal neuron  
275 expressing MerMAID6-Citrine (green) 5 days after electroporation (stitched maximum intensity  
276 projections of two-photon images). mCerulean (magenta) was co-electroporated to visualize  
277 neuronal morphology (left). Fluorescence intensity shown as inverted gray values (right). **b** and **c**,  
278 Voltage traces in response to depolarizing current ramps injected into MerMAID6-expressing CA1  
279 pyramidal cells. Illumination with green light (500 nm, 10mW/mm<sup>2</sup>) for a brief (10 ms, **b**) or longer  
280 (500 ms, **c**) time period blocked single spikes. Light onset preceded action potential onset  
281 (measured in the dark condition) by 5 ms. **d**, Same as (**c**) but a depolarizing current step of 300  
282 pA was injected into the neuron instead of a current ramp.

283 Finally, we evaluated the utility of MerMAIDs as optogenetic tools for inhibiting neuronal activity.  
284 As MerMAID6 exhibited the highest photocurrent in HEK cells (Fig. 1e), we generated a Citrine-  
285 labeled MerMAID6 variant and co-expressed it with mCerulean as a volume marker. MerMAID6-  
286 Citrine expression was readily detected in CA1 pyramidal neurons of hippocampal slice cultures  
287 4 to 5 days after single-cell electroporation. We observed membrane-localized MerMAID6  
288 expression, with some fraction of the protein displaying a speckled cellular distribution (Fig. 5a).  
289 However, illumination triggered high transmembrane photocurrents with biophysical properties  
290 similar to those observed in HEK cells (Fig. S8). The large, transient photocurrents observed in  
291 neurons led us to hypothesize that MerMAID6 could be used to block single action potentials (APs)  
292 with high temporal precision and without affecting subsequent APs in the presence of light. We  
293 first injected a depolarizing current ramp into the soma to precisely determine the rheobase for AP  
294 firing in the dark. A 10 ms light pulse synchronized with the first AP that occurred during darkness  
295 eliminated generation of this AP (Fig. 5b). We then applied a 500 ms light pulse synchronized to  
296 the time of onset of the first AP lasting throughout the remainder of the current ramp (Fig. 5c) or a  
297 depolarizing current step (Fig. 5d), MerMAID6 suppressed generation of the first AP, without  
298 affecting the following ones due to rapid accumulation of the desensitized and non-conducting  
299 state during extended illumination. Similarly, selective inhibition of a single AP was achieved with  
300 MerMAID1 (Fig. S7), demonstrating that photoactivated MerMAID1 and 6 provide efficient and  
301 temporally precise inhibition of neuronal activity.

302

## 303 **Discussion**

304 We extensively characterized the biophysical properties of the MerMAIDs, a new family of ChRs  
305 identified from metagenomic data. All MerMAIDs share similar activity maxima optimal for sensing  
306 light in moderate-depth seawater. Similar to other recently discovered natural ACRs<sup>23</sup>, MerMAIDs  
307 selectively conduct anions. Distinct from all other ChRs, MerMAIDs exhibit almost complete  
308 desensitization during exposure to continuous bright light. However, the environmental advantage  
309 of near-complete desensitization compared with non-inactivating ACRs is unclear.

310 After photon absorption, the MerMAID1 chromophore isomerizes from *all-trans* to *13-cis*, as  
311 demonstrated by RR and FTIR spectroscopy. We hypothesize that the RSBH<sup>+</sup> dipole changes  
312 orientation and distance with respect to the nearby D210, as evidenced by formation of the L-  
313 intermediate, analogous to bacteriorhodopsin<sup>33</sup>. The K→L transition and formation of the open  
314 state is accompanied by minimal protein backbone changes that induce changes in hydrogen  
315 bonding and side-chain pK values, presumably involving the active-site residues D210 and E44.  
316 Maximum channel conductivity, reached within 350 μs, is UV/vis spectroscopically almost silent.  
317 Channel closing proceeds concurrently with RSB deprotonation, leading to M-intermediate  
318 formation, similar to cryptophyte ACRs<sup>24,44</sup> but in contrast to chlorophyte CCRs, in which M-state  
319 formation precedes channel opening<sup>45,46</sup>. These observations suggest that the positively charged  
320 protonated RSB is part of the chloride conducting pathway, consistent with the calculated ion  
321 permeation pathway along the counter-ion complex, similar to crystal structures of *Guillardia theta*  
322 ACR1 (*GtACR1*)<sup>38,47</sup>. Chloride flux in MerMAID1 is interrupted by charge repulsion following  
323 deprotonation of the Schiff base. In the final photocycle step, MerMAID1 structurally rearranges,  
324 the RSB reprotonates, and the initial dark state is fully repopulated within seconds.

325 The observation that photocurrent kinetics were not affected by intra- or extracellular pH changes  
326 suggests that the RSB proton remains within the central active-site complex during the photocycle,  
327 as recently reported for heliorhodopsins<sup>31</sup>. D210 is the primary counterion of the RSB in



328 MerMAID1, but both carboxylic residues (E44 and D210) participate in de- and reprotonation of  
329 the MerMAID1 chromophore, as neutralization of either one or both residues affects formation of  
330 the conductive or desensitized state. However, retention of function of the E44Q-D210N double  
331 mutant suggests the possibility of alternative proton acceptor and donor sites.

332 The unique desensitization of the MerMAIDs can be explained by the accumulation of the blue-  
333 shifted M-intermediate during constant photoactivation. Because the non-conducting M-  
334 intermediate is formed within milliseconds and decays only within hundreds of milliseconds, the  
335 current declines to 1 % in continuous light. This mechanism is consistent with an M-state that  
336 cannot be photochemically converted back to the dark state (Fig. S5g,h). As discussed in previous  
337 reports, decline of CrChR2 photocurrents upon continuous illumination is due to both, the  
338 accumulation of late non-conducting photocycle intermediates and population of a parallel (*syn*-)  
339 photocycle with an only weakly conducting open state<sup>7-9</sup>. The accumulation of a late photocycle  
340 intermediate is the dominant mechanism in MerMAID1, as demonstrated by FTIR spectroscopy;  
341 no parallel photocycle is needed to explain the strong inactivation.

342 We found that replacing C84 in MerMAID1 decreases the peak photocurrent but increases  
343 stationary photocurrents, thus reducing the extent of desensitization, possibly due to either a  
344 prolonged L-state or a shortened recovery from the M- to the initial dark state. C84 could have  
345 dual functions in wild-type MerMAID1: i) stabilizing the deprotonated RSB to retain the repulsing  
346 charge in the ion pathway and block the channel; ii) suppression of C=N *anti* to *syn* isomerization  
347 and population of parallel *syn*-photocycles as discussed for CrChR2<sup>10</sup>.

348 Another unusual feature of MerMAID1 are the fine-structured absorption spectra of both the  
349 deprotonated all-*trans* RSB in the dark at alkaline pH and the 13-*cis* retinal of the M-state. Such  
350 unusual spectra have been reported for other microbial rhodopsins after retro-retinal formation  
351 upon reduction with borohydride<sup>48</sup> or hydrolysis of the RSB<sup>49</sup>. In both cases, the UV fine structure  
352 results from immobility of the deprotonated chromophore, which is typically more pronounced at

353 deep temperatures<sup>50,51</sup>. Alkalization-induced fine-structured spectra were reported for eACRs<sup>38</sup>  
354 and wild-type and mutant nACRs<sup>44</sup> and suggested to result from RSB hydrolysis<sup>38</sup> or protein  
355 denaturation<sup>52</sup>. However, in *GtACR1*, the covalent bond between the retinal and the Schiff base-  
356 forming lysine is not broken at high pH. Instead, the RSB deprotonates and adopts an M-like  
357 configuration<sup>53</sup>. RR spectra of MerMAID1 at pH 10 (Fig. S5e) suggested that the retinal is similarly  
358 deprotonated and adopts a rigid configuration in all-*trans* instead of 13-*cis*, as in the M-state.

359 MerMAID1 and 6 effectively inhibited neuronal activity with high temporal precision. Due to the  
360 unique desensitization of the MerMAIDs under continuous illumination, single APs can be blocked  
361 at the onset of illumination without affecting subsequent neuronal spiking. Hence, MerMAIDs could  
362 serve as transient optogenetic silencers to inhibit individual APs with high precision in combination  
363 with subsequent imaging of spectrally overlapping reporters of neuronal activity. MerMAIDs would  
364 thus facilitate continuous monitoring of neuronal activity subsequent to short-duration inhibition at  
365 the same wavelength.

366 The identification of the entirely new ChR family fortifies the value of metagenomic data for the  
367 discovery of novel photoreceptor proteins potentially applicable as optogenetic tools. The initial  
368 in-depth characterization of MerMAIDs will foster the generation of ChRs with novel biophysical  
369 properties and lead to deeper understanding of the working principles of rhodopsins.

## 370 **Methods**

### 371 *Identification of novel channelrhodopsins and metagenomics data analysis*

372 Novel channelrhodopsin variants were identified using full-length *CrChR1* and *CrChR2* amino acid  
373 sequences (GenBank: AAL08946.1, and NCBI reference sequence: XP\_001701725.1,  
374 respectively) as queries for tblastn 2.6.0 analysis<sup>54</sup> against a database of contigs assembled from  
375 the *Tara Oceans* metagenomic datasets of bacterial<sup>55</sup>, viral<sup>56</sup>, and girus<sup>57</sup> samples. The  
376 assemblies were generated as described elsewhere<sup>58</sup>.

377 MerMAID abundance in the marine environment was estimated using the Ocean Gene Atlas<sup>59</sup>  
378 after mining the Ocean Microbial Reference Gene Catalog<sup>55</sup>. A collection of representative  
379 microbial rhodopsin protein sequences from distinct subfamilies containing the MerMAIDs was  
380 aligned using the MAFFT online server (ver. 7)<sup>60</sup>. The alignment was used to generate a Hidden  
381 Markov Model (HMM) using hmmbuild from the HMMER 3.1b2 suite<sup>61</sup>. The HMM served as the  
382 query in the Ocean Gene Atlas<sup>59</sup> or an HMMER-based search with default parameters against the  
383 Ocean Microbial Reference Gene Catalog. The Ocean Gene Atlas results for abundances and  
384 homologs were stored locally for further analysis.

385 Protein homologs from the Ocean Gene Atlas and MerMAIDs were pooled and aligned using the  
386 MAFFT web server. MAFFT multiple sequence alignment was used to identify those homologs  
387 phylogenetically closer to the MerMAIDs and were tagged as MerMAID-like. Ocean Gene Atlas  
388 abundance data were parsed using a custom R script to calculate the ratio of ACR-like proteins  
389 to total rhodopsins in each *Tara* Oceans sample. The MerMAID-like/total rhodopsin ratio was  
390 coupled with environmental metadata from the *Tara* Oceans samples to generate depth profiles  
391 and distribution maps using the R packages maps<sup>62</sup>, ggplot2<sup>63</sup>, and ggalt<sup>64</sup>.

392 The phylogenetic tree was generated using phylogeny.fr<sup>65</sup> and the sequence alignment using  
393 Clustal X<sup>66</sup>. The sequence alignment was visualized using the ENDscript 2 web server<sup>67</sup>, and the  
394 alignment was cropped to include the transmembrane regions of selected ChRs.

#### 395 *Molecular biology and protein purification*

396 Human/mouse codon-optimized sequences encoding MerMAIDs were synthesized (GenScript,  
397 Piscataway, NJ) and cloned into the p-mCherry-C1 vector using *NheI* and *AgeI* restriction sites  
398 (FastDigest, Thermo Fisher Scientific, Waltham, MA) for electrophysiologic recordings in HEK293  
399 cells. Due to incomplete metagenomic data, a methionine was added as start codon for MerMAID1  
400 and MerMAID4. Site-directed mutagenesis was performed using *Pfu* polymerase (Agilent

401 Technologies, Santa Clara, CA). MerMAID1 and MerMAID6 cDNAs were subcloned into neuron-  
402 specific expression vectors (pAAV backbone, human synapsin promoter) in frame with Citrine  
403 cDNA using Gibson assembly<sup>68</sup>. For expression in *Pichia pastoris*, the MerMAID1 gene was  
404 subcloned with a C-terminal TEV protease restriction site and a 6× His-Tag into the pPicZ vector  
405 (Invitrogen, Carlsbad, CA). Zeocin<sup>TM</sup>-resistant positive clones were selected from electroporation-  
406 transformed yeast cells. Expression of MerMAID1 in precultured cells was induced with  
407 2.5% methanol in presence of 5 μM all-*trans* retinal for 24 h. Cells were harvested by  
408 centrifugation and resuspended in breaking buffer (50 mM NaPO<sub>4</sub>, 1 mM EDTA, 1 mM PMSF,  
409 5% glycerol [pH 7.4]) and disrupted by high pressure using a French press (G. Heinemann  
410 Ultraschall und Labortechnik, Schwäbisch Gmünd, Germany). The membrane fraction was  
411 collected, homogenized, and solubilized overnight at 4°C in 100 mM NaCl, 20 mM Tris-HCl,  
412 20 mM imidazole, 1 mM PMSF, 5 μM all-*trans* retinal, and 1% (*w/v*) dodecyl maltoside (DDM).  
413 Recombinant rhodopsin was purified by affinity chromatography (HisTrap<sup>TM</sup> FF Crude column, GE  
414 Healthcare Life Science, Chicago, IL) and gel filtration (HiPrep<sup>TM</sup> 26/10 desalting, GE Healthcare  
415 Life Science). Before elution, an additional washing step with buffer containing 50 mM imidazole  
416 was performed. Purified protein was concentrated and stored in 100 mM NaCl, 20 mM Tris-HCl  
417 (pH 8), and 0.05% DDM.

#### 418 *Electrophysiology in HEK293 cells*

419 HEK293 cell culture and electrophysiologic experiments were performed as described  
420 previously<sup>22,69</sup>. Cells were supplemented with 1 μM all-*trans* retinal, seeded at a density of  
421  $1 \times 10^5$ /ml on poly-D-lysine-coated coverslips, and transiently transfected using Fugene HD  
422 (Promega, Madison, WI). At 1 to 2 days post-transfection, whole-cell patch-clamp recordings were  
423 performed at 24 °C. The resistance of fire-polished patch pipettes was 1.5–2.5 MΩ, and a  
424 140 mM NaCl agar bridge served as the reference electrode. Membrane resistance was generally  
425  $\geq 1$  GΩ, and the access resistance was  $< 10$  MΩ. Signals were amplified (AxoPatch200B), digitized

426 (DigiData400), and acquired using Clampex 10.4 (all from Molecular Devices, Sunnyvale, CA).  
427 Light from a Polychrome V (TILL Photonics, Planegg, Germany) with 7 nm bandwidth was  
428 channeled into an Axiovert 100 microscope (Carl Zeiss, Jena, Germany) controlled via a  
429 programmable shutter system (VS25 and VCM-D1; Vincent Associates, Rochester, NY). Light  
430 intensity was measured in the sample plane using a calibrated optometer (P9710; Gigahertz Optik,  
431 Türkenfeld, Germany) and calculated for the illuminated field of the W Plan-Apochromat 40×/1.0  
432 DIC objective (0.066 mm<sup>2</sup>, Carl Zeiss). Final buffer osmolarity was set with glucose to 320 mOsm  
433 (extracellular) or 290 mOsm (intracellular), and the pH was adjusted using N-methyl-D-glucamine  
434 or citric acid. Liquid junction potentials were calculated (Clampex 10.4) and corrected. For ion  
435 selectivity measurements, extracellular buffers (supplementary table S1) were exchanged in  
436 random order by adding at least 3 ml to the measuring chamber (volume ~0.5 ml). Fluid level was  
437 kept constant using an MPCU bath handler (Lorentz Messgerätebau, Katlenburg-Lindau,  
438 Germany). MerMAID photocurrents were induced for 500 ms and recorded between -80 and  
439 +40 mV in 20-mV steps. Low-intensity light between 390 and 680 nm was applied in 10-nm steps  
440 for 10 ms at -60 mV to generate action spectra. Equal photon irradiance at all wavelengths was  
441 achieved using a motorized neutral-density filter wheel (Newport, Irvine, CA) in the light path,  
442 controlled by custom software written in LabVIEW (National Instruments, Austin, TX). For light  
443 titration experiments, photocurrents were induced for 2 s at -60 mV, and light was attenuated  
444 using ND filters (SCHOTT, Mainz, Germany) inserted into the light path using a motorized,  
445 software-controlled filter wheel (FW212C, Thorlabs, Newton, NJ). Single-turnover experiments  
446 were performed with the above mentioned setup described elsewhere<sup>10,70</sup>. An Opolette HE 355  
447 LD Nd:YAG laser/OPO system (OPOTEK, Carlsbad, CA) served as pulsed laser light source.

#### 448 *UV-Vis Spectroscopy*

449 Steady-state absorption spectra were recorded using a Cary 300 UV/vis spectrophotometer  
450 (Varian Inc., Palo Alto, USA) or UV-2600 UV/vis spectrophotometer (Shimadzu, Kyōto, Japan) at

451 a spectral resolution of 1 nm in buffer containing 100 mM NaCl, 20 mM Tris, and 0.05% DDM  
452 (pH 8). Light-adapted absorption spectra were acquired by illuminating the sample with a 530 nm  
453 LED with a  $520 \pm 15$  nm filter. For pH titration experiments, small volumes of 1 M NaOH were  
454 added to samples in titration buffer (100 mM NaCl, 10 mM BTP, 10 mM CAPS, 0.05% DDM  
455 [pH 7.5]). The pH was measured using pH microelectrodes (SI Analytics, Mainz, Germany). The  
456 transient absorption spectroscopic measurements shown in Figure S5b,c were performed as  
457 previously reported<sup>24</sup> at 22°C using a modified LKS.60 flash-photolysis system (Applied  
458 Photophysics Ltd., Leatherhead, UK). For sample excitation, the laser pulse was tuned to 500 nm  
459 using a tunable optical parametric oscillator (MagicPrism, OPOTEK), which was pumped with the  
460 third harmonic of a Nd:YAG laser (BrilliantB, Quantel, Les Ulis, France). The laser energy was  
461 adjusted to 5 mJ/shot and pulse duration of 10 ns. A 150-W xenon lamp (Osram, München,  
462 Germany) was used to monitor changes in absorption. Transient spectra were recorded in multi-  
463 wavelength data sets at a resolution of 0.4 nm using an Andor iStar ICCD camera (DH734; Andor  
464 Technology Ltd, Belfast, Ireland). Spectra were recorded at 101 different time points between  
465 10 ns and 100 s (10 points per decade, isologarithmically). To ensure complete recovery of the  
466 dark state, samples were kept in the dark for 120 s before the subsequent recording. For the  
467 transient absorption spectra shown in Figure 3h, FTIR samples were used. Spectra were recorded  
468 using an Ocean FX array detector (Ocean Optics, Largo, FL) with a spectral resolution of 2.4 nm  
469 and integration time of 50 ms. Samples were illuminated using a 50 mW continuous-wave LASER  
470 emitting 532-nm light (no. 37028, Edmund Optics, York, UK).

#### 471 *FTIR spectroscopy*

472 To prepare samples for FTIR, 10  $\mu$ l of initial protein solution (>20 mg/ml, 100 mM NaCl, 20 mM  
473 Tris, 0.05% DDM [pH 8]) was dried stepwise on a BaF<sub>2</sub> window under a stream of dry air and  
474 subsequently rehydrated. Samples were then sealed with a second BaF<sub>2</sub> window. To ensure  
475 constant sample thickness, a 3- $\mu$ m PTFE spacer was placed between the windows. For

476 deuteration, the protein solution was washed at least five times with deuterium buffer (100 mM  
477 NaCl, 20 mM Tris, 0.05% DDM [pD 8]) using Centricon filters and subsequently illuminated using  
478 white light to improve deuteration inside the opened channel. FTIR spectra were acquired at 0°C  
479 using a Vertex 80v FTIR spectrometer (Bruker Optics, Karlsruhe, Germany) equipped with a liquid  
480 nitrogen-cooled MCT detector (Kolmar Technologies, Newburyport, MA). The spectrometer was  
481 operated in rapid scan mode with a data acquisition rate of 300 kHz and spectral resolution of  
482  $8\text{ cm}^{-1}$ . An optical cutoff filter at  $1850\text{ cm}^{-1}$  was used in the beamline. After at least 60 min for  
483 equilibration, samples were continuously illuminated using a set of green-light LEDs with an  
484 emission maximum of 520 nm. Single-turnover illumination was performed using a 10-Hz pulsed  
485 Nd:YAG Powerlite 9010 LASER as the pump source for a Horizon II optical parametric oscillator  
486 (Continuum, San Jose, CA) set to 530 nm. The pulse width of the setup was approximately  
487  $5 \pm 2\text{ ns}$ , with an energy output of approximately 60 mJ. The time resolution was 6 ms (achieved  
488 by operation in forward-backward mode and splitting of the interferogram).

#### 489 *RR spectroscopy*

490 RR spectra were acquired with excitation lines of an Ar<sup>+</sup> (514 nm, 488 nm) and Kr<sup>+</sup> laser (413 nm)  
491 (Coherent, Santa Clara CA). Raman signals were detected in a backscattering configuration  
492 ( $180^\circ$ ) using a confocal LabRamHR spectrometer (Horiba, Villeneuve, France) equipped with a  
493 liquid nitrogen-cooled CCD detector. The spectral resolution was approximately  $2\text{ cm}^{-1}$ . Typical  
494 total accumulation time and laser power at the sample were 30 min and 1 mW, respectively. Low-  
495 temperature measurements at 80K were carried out with a Linkam cryostat (Linkam Scientific  
496 Instruments, Surrey, UK). Samples were inserted into the cell under dimmed red light in order to  
497 avoid photoactivation before freezing.

#### 498 *MD simulations*

499 Classical MD simulations were prepared based on a SWISS homology model<sup>71</sup> of MerMAID1 on  
500 iC++ at pH 8.5 (PDB 6CSN). The iC++ structure was chosen as template as it showed the best  
501 combined quality features for structural prediction (best coverage and QMQE [0.61 together with  
502 PDB 6CSM], 2<sup>nd</sup> best QSQE [0.27 vs. 0.28 with PDB 4YZI], and 3<sup>rd</sup> best identity [32.69% vs.  
503 35.61% with PDB 6EID]). The model was prepared using CHARMM-GUI<sup>72</sup> for the resting state of  
504 MerMAID1 with standard protonation for all amino acids. The MerMAID1 monomer was embedded  
505 inside a 60 × 60 Å, homogeneous, 1,2-dimyristoyl-sn-glycero-3-phosphocholine bilayer  
506 membrane and solvated using a TIP3 water box, adding 10 Å to both the top and bottom of the  
507 protein. Systems were simulated under *NPT* conditions using a 2 fs time step, a 303.15 K heat  
508 bath, the particle-mesh Ewald method for long-range electrostatics, and the CHARMM36 force  
509 field<sup>73</sup>. pK<sub>a</sub> calculations for all titratable amino acids of MerMAID1 were performed using APBS<sup>74</sup>  
510 in a conformational space of three pH-adapted conformations (PACs) and the Monte Carlo  
511 procedure of Karlsberg2+<sup>75,76</sup> to sample all residues. PACs were created using Karlsberg2+ in a  
512 self-consistent cycle including adjustment of protonation patterns of titratable amino acids and salt  
513 bridge opening according to pH -10, 7, or 20. To calculate pK<sub>a</sub> values for MerMAID1 MD frames,  
514 only the holoprotein structure was used. Lipids and water molecules were substituted with  
515 continuum solvation. Ion channels were predicted using MOLEonline<sup>39</sup>.

#### 516 *Neuronal recordings and two-photon microscopy*

517 Organotypic slice cultures of rat hippocampus were prepared as described<sup>77</sup> and transfected by  
518 single-cell electroporation<sup>78</sup> after 14-16 days in vitro (DIV). Plasmids were each diluted to 1 ng/μl  
519 in K-gluconate-based solution consisting of (in mM): 135 K-gluconate, 4 MgCl<sub>2</sub>, 4 Na<sub>2</sub>-ATP, 0.4  
520 Na-GTP, 10 Na<sub>2</sub>-phosphocreatine, 3 ascorbate, 0.02 Alexa Fluor 594, and 10 HEPES (pH 7.2).  
521 An Axoporation 800A (Molecular Devices) was used to deliver 50 hyperpolarizing pulses (-12 mV,  
522 0.5 ms) at 50 Hz. At DIV 19-21, targeted patch-clamp recordings of transfected neurons were  
523 performed under visual guidance using a BX 51WI microscope (Olympus, Shinjuku, Japan)



524 equipped with Dodt-gradient contrast and a Double IPA integrated patch amplifier controlled with  
525 SutterPatch software (Sutter Instrument, Novato, CA). Patch pipettes with a tip resistance of 3-  
526 4 M $\Omega$  were filled with intracellular solution consisting of (in mM): 135 K-gluconate, 4 MgCl<sub>2</sub>, 4 Na<sub>2</sub>-  
527 ATP, 0.4 Na-GTP, 10 Na<sub>2</sub>-phosphocreatine, 3 ascorbate, 0.2 EGTA, and 10 HEPES (pH 7.2).  
528 Artificial cerebrospinal fluid (ACSF) consisted of (in mM): 135 NaCl, 2.5 KCl, 2 CaCl<sub>2</sub>, 1 MgCl<sub>2</sub>, 10  
529 Na-HEPES, 12.5 D-glucose, 1.25 NaH<sub>2</sub>PO<sub>4</sub> (pH 7.4). Synaptic currents were blocked with 10  $\mu$ M  
530 CPPene, 10  $\mu$ M NBQX, and 100  $\mu$ M picrotoxin (Tocris, Bristol, UK). Measurements were  
531 corrected for a liquid junction potential of -14.5 mV. A 16 channel pE-4000 LED light engine  
532 (CoolLED, Andover, UK) was used for epifluorescence excitation and delivery of light pulses for  
533 optogenetic stimulation (ranging from 385-635 nm). Light intensity was measured in the object  
534 plane with a 1918 R power meter equipped with a calibrated 818 ST2 UV/D detector (Newport)  
535 and divided by the illuminated field (0.134 mm<sup>2</sup>) of the LUMPLFLN 60XW objective (Olympus).

536 Neurons in organotypic slice cultures were imaged with two-photon microscopy to characterize  
537 their morphology and the subcellular localization of citrine-labeled MerMAID-ChRs. The custom-  
538 built two-photon imaging setup was based on an Olympus BX-51WI upright microscope upgraded  
539 with a multiphoton imaging package (DF-Scope, Sutter Instrument), and controlled by ScanImage  
540 2017b (Vidrio Technologies, Ashburn, VA). Fluorescence was detected through the objective (NIR  
541 Apo 40XW, Nikon, Minato, Japan) using GaAsP-PMTs (Hamamatsu Photonics, Hamamatsu,  
542 Japan). A tunable Ti:Sapphire laser (Chameleon Vision-S, Coherent) was set to 810 nm to excite  
543 mCerulean, and a high power femtosecond fiber laser (Fidelity-2, Coherent, Santa Clara, CA) was  
544 used to excite citrine at 1070 nm.

#### 545 *Data analysis and statistical methods*

546 Clampfit 10.4 (Molecular Devices) and Origin 2017 (OriginLab, Northampton, MA) were used for  
547 analysis of HEK293 electrophysiological recordings. Peak currents were used for analysis of most  
548 biophysical properties. The current of the last 50 ms of the illumination period was averaged to

549 determine stationary current amplitude. Reversal potentials were determined based on linear fit of  
550 the two data points crossing 0 pA or linear extrapolation from 0 pA most adjacent two data points  
551 of a measurement series. Action spectra were normalized to the maximum response and fitted  
552 with a three-parametric Weibull function to determine the maximum response wavelength ( $\lambda_{\max}$ ).  
553 Kinetic time constants were determined by mono or bi-exponential fits. For displaying reasons  
554 electrophysiological recording data points were reduced.

555 Single turnover UV/vis absorption measurements were averaged over 15 cycles. Primary data  
556 analysis was performed using MATLAB R2016b (The MathWorks, Natick, MA) to calculate  
557 difference spectra and reconstruct three-dimensional spectra. Glotaran 1.5.1<sup>79,80</sup> was used for  
558 global analysis of the spectral datasets. Time constant values and photointermediate spectra were  
559 obtained via global analysis of the data sets. The sequential model explored spectral evolution  
560 and produced the EADS, representing the species-associated difference spectra<sup>81</sup>.

561 Stationary absorption spectra were analyzed using Origin 2017, normalized to maximum  
562 absorption at 280 nm or maximum chromophore absorption, smoothed using Savitzki-Golay  
563 method using a 10-point window and 5<sup>th</sup> order polynomial function.  $Pk_a$ -values were determined  
564 with a Boltzmann function.

565 FTIR difference spectra were preprocessed using OPUS 7.5 software (Bruker Optics). FTIR data  
566 were analyzed via single value decomposition and rotation procedure and subsequent global fit  
567 algorithm implemented in Octave 4.2.<sup>82,83</sup>. Assuming a sequential reaction scheme, a sum of  
568 exponential functions was used as the fit model.

569 RR data was background subtracted with custom written software using a polynomial function.

570 VMD<sup>84</sup> and PyMol 2.2.3 were used to analyze and visualize MD simulation results and computed  
571 ion permeation pathways.

572 Neurophysiological data were analyzed and plotted in Igor Pro 8.0.

573 If not stated otherwise, data was plotted using either MATLAB, GraphPad Prism 7.0 or Origin  
574 2017. Final esthetical adjustments were performed using Adobe Illustrator 2017 (Adobe Systems,  
575 San José, CA) or Affinity Designer 1.6 (Serif, Nottingham, UK)

576 No statistical tests were used to predetermine sample size. Sample sizes were similar to those  
577 commonly used in this research field. Repeated experiments always refer to biological replicates  
578 performed using at least two batches of transfected cell cultures. Data is given as mean  $\pm$  standard  
579 deviation. Single measurement data and further statistical analysis<sup>85</sup> are provided in the  
580 Supplementary Material. Blinding was not performed to ensure correct assignment of the data to  
581 the measured constructs and/or experimental conditions. However, randomization was performed  
582 in case of buffer exchange experiments and automated analysis was used whenever possible.

### 583 **Data availability**

584 HEK-293 Electrophysiological data is included in the Supplementary Material. Code and data of  
585 metagenomic analysis can be obtained from <https://github.com/BejaLab/MerMAIDs>. Further data  
586 or code is available from the corresponding authors upon request. DNA sequences will be  
587 deposited on Addgene.

### 588 **References**

- 589 1. Nagel, G. *et al.* Channelrhodopsin-1: A Light-Gated Proton Channel in Green Algae. *Science*  
590 **296**, 2395–2398 (2002).
- 591 2. Nagel, G. *et al.* Channelrhodopsin-2, a directly light-gated cation-selective membrane  
592 channel. *Proc. Natl. Acad. Sci.* **100**, 13940–13945 (2003).
- 593 3. Sineshchekov, O. A., Jung, K.-H. & Spudich, J. L. Two rhodopsins mediate phototaxis to low-  
594 and high-intensity light in *Chlamydomonas reinhardtii*. *Proc. Natl. Acad. Sci.* **99**, 8689–8694  
595 (2002).

- 596 4. Schneider, F., Grimm, C. & Hegemann, P. Biophysics of Channelrhodopsin. *Annu. Rev.*  
597 *Biophys.* **44**, 167–186 (2015).
- 598 5. Lin, J. Y., Lin, M. Z., Steinbach, P. & Tsien, R. Y. Characterization of Engineered  
599 Channelrhodopsin Variants with Improved Properties and Kinetics. *Biophys. J.* **96**, 1803–1814  
600 (2009).
- 601 6. Fenno, L., Yizhar, O. & Deisseroth, K. The Development and Application of Optogenetics.  
602 *Annu. Rev. Neurosci.* **34**, 389–412 (2011).
- 603 7. Hegemann, P., Ehlenbeck, S. & Gradmann, D. Multiple Photocycles of Channelrhodopsin.  
604 *Biophys. J.* **89**, 3911–3918 (2005).
- 605 8. Stehfest, K. & Hegemann, P. Evolution of the Channelrhodopsin Photocycle Model.  
606 *ChemPhysChem* **11**, 1120–1126 (2010).
- 607 9. Lórenz-Fonfría, V. A. & Heberle, J. Channelrhodopsin unchained: Structure and mechanism  
608 of a light-gated cation channel. *Biochim. Biophys. Acta BBA - Bioenerg.* **1837**, 626–642  
609 (2014).
- 610 10. Kuhne, J. *et al.* A unifying photocycle model for light adaptation and temporal evolution of  
611 cation conductance in Channelrhodopsin-2. *bioRxiv* 1–29 (2018). doi:10.1101/503706
- 612 11. Boyden, E. S., Zhang, F., Bamberg, E., Nagel, G. & Deisseroth, K. Millisecond-timescale,  
613 genetically targeted optical control of neural activity. *Nat. Neurosci.* **8**, 1263–1268 (2005).
- 614 12. Ishizuka, T., Kakuda, M., Araki, R. & Yawo, H. Kinetic evaluation of photosensitivity in  
615 genetically engineered neurons expressing green algae light-gated channels. *Neurosci. Res.*  
616 **54**, 85–94 (2006).
- 617 13. Li, X. *et al.* Fast noninvasive activation and inhibition of neural and network activity by  
618 vertebrate rhodopsin and green algae channelrhodopsin. *Proc. Natl. Acad. Sci.* **102**, 17816–  
619 17821 (2005).
- 620 14. Nagel, G. *et al.* Light Activation of Channelrhodopsin-2 in Excitable Cells of *Caenorhabditis*  
621 *elegans* Triggers Rapid Behavioral Responses. *Curr. Biol.* **15**, 2279–2284 (2005).

- 622 15. Bi, A. *et al.* Ectopic Expression of a Microbial-Type Rhodopsin Restores Visual Responses in  
623 Mice with Photoreceptor Degeneration. *Neuron* **50**, 23–33 (2006).
- 624 16. Zhang, F. *et al.* Multimodal fast optical interrogation of neural circuitry. *Nature* **446**, 633–639  
625 (2007).
- 626 17. Chow, B. Y. *et al.* High-performance genetically targetable optical neural silencing by light-  
627 driven proton pumps. *Nature* **463**, 98–102 (2010).
- 628 18. Wietek, J. *et al.* Conversion of Channelrhodopsin into a Light-Gated Chloride Channel.  
629 *Science* **344**, 409–412 (2014).
- 630 19. Berndt, A., Lee, S. Y., Ramakrishnan, C. & Deisseroth, K. Structure-Guided Transformation  
631 of Channelrhodopsin into a Light-Activated Chloride Channel. *Science* **344**, 420–424 (2014).
- 632 20. Wietek, J. *et al.* An improved chloride-conducting channelrhodopsin for light-induced inhibition  
633 of neuronal activity in vivo. *Sci. Rep.* **5**, (2015).
- 634 21. Berndt, A. *et al.* Structural foundations of optogenetics: Determinants of channelrhodopsin ion  
635 selectivity. *Proc. Natl. Acad. Sci.* **113**, 822–829 (2016).
- 636 22. Wietek, J. *et al.* Anion-conducting channelrhodopsins with tuned spectra and modified kinetics  
637 engineered for optogenetic manipulation of behavior. *Sci. Rep.* **7**, 14957 (2017).
- 638 23. Govorunova, E. G., Sineshchekov, O. A., Janz, R., Liu, X. & Spudich, J. L. Natural light-gated  
639 anion channels: A family of microbial rhodopsins for advanced optogenetics. *Science* **349**,  
640 647–650 (2015).
- 641 24. Wietek, J., Broser, M., Krause, B. S. & Hegemann, P. Identification of a Natural Green Light  
642 Absorbing Chloride Conducting Channelrhodopsin from *Proteomonas sulcata*. *J. Biol.*  
643 *Chem.* **291**, 4121–4127 (2016).
- 644 25. Govorunova, E. G., Sineshchekov, O. A. & Spudich, J. L. *Proteomonas sulcata* ACR1: A Fast  
645 Anion Channelrhodopsin. *Photochem. Photobiol.* **92**, 257–263 (2016).
- 646 26. Govorunova, E. G. *et al.* The Expanding Family of Natural Anion Channelrhodopsins Reveals  
647 Large Variations in Kinetics, Conductance and Spectral Sensitivity. *Sci. Rep.* **7**, 43358 (2017).

- 648 27. Park, S. *et al.* Neuronal Allocation to a Hippocampal Engram. *Neuropsychopharmacology* **41**,  
649 2987–2993 (2016).
- 650 28. Mahn, M., Prigge, M., Ron, S., Levy, R. & Yizhar, O. Biophysical constraints of optogenetic  
651 inhibition at presynaptic terminals. *Nat. Neurosci.* **19**, 554–556 (2016).
- 652 29. Takahashi, N., Oertner, T. G., Hegemann, P. & Larkum, M. E. Active cortical dendrites  
653 modulate perception. *Science* **354**, 1587–1590 (2016).
- 654 30. Mohammad, F. *et al.* Optogenetic inhibition of behavior with anion channelrhodopsins. *Nat.*  
655 *Methods* **14**, 271–274 (2017).
- 656 31. Pushkarev, A. *et al.* A distinct abundant group of microbial rhodopsins discovered using  
657 functional metagenomics. *Nature* **558**, 595–599 (2018).
- 658 32. Luck, M. & Hegemann, P. The two parallel Photocycles of the Chlamydomonas Sensory  
659 Photoreceptor Histidine Kinase Rhodopsin 1. *J. Plant Physiol.* (2017).  
660 doi:10.1016/j.jplph.2017.07.008
- 661 33. Kouyama, T., Nishikawa, T., Tokuhisa, T. & Okumura, H. Crystal Structure of the L  
662 Intermediate of Bacteriorhodopsin: Evidence for Vertical Translocation of a Water Molecule  
663 during the Proton Pumping Cycle. *J. Mol. Biol.* **335**, 531–546 (2004).
- 664 34. Smith, S. O. *et al.* Vibrational analysis of the all-trans retinal protonated Schiff base. *Biophys.*  
665 *J.* **47**, 653–664 (1985).
- 666 35. Bruun, S. *et al.* Light–Dark Adaptation of Channelrhodopsin Involves Photoconversion  
667 between the all- trans and 13- cis Retinal Isomers. *Biochemistry* **54**, 5389–5400 (2015).
- 668 36. Nack, M., Radu, I., Bamann, C., Bamberg, E. & Heberle, J. The retinal structure of  
669 channelrhodopsin-2 assessed by resonance Raman spectroscopy. *FEBS Lett.* **583**, 3676–  
670 3680 (2009).
- 671 37. Smith, S. O., Pardo, J. A., Lugtenburg, J. & Mathies, R. A. Vibrational Analysis of the 13-  
672 cis-Retinal Chromophore in Dark-Adapted Bacteriorhodopsin. *J. Phys. Chem.* **91**, 804–819  
673 (1987).

- 674 38. Kato, H. E. *et al.* Structural mechanisms of selectivity and gating in anion channelrhodopsins.  
675 *Nature* **561**, 349–354 (2018).
- 676 39. Pravda, L. *et al.* MOLEonline: a web-based tool for analyzing channels, tunnels and pores  
677 (2018 update). *Nucleic Acids Res.* **46**, W368–W373 (2018).
- 678 40. Joh, N. H. *et al.* Modest stabilization by most hydrogen-bonded side-chain interactions in  
679 membrane proteins. *Nature* **453**, 1266–1270 (2008).
- 680 41. Luecke, H., Schobert, B., Richter, H.-T., Cartailler, J.-P. & Lanyi, J. K. Structure of  
681 bacteriorhodopsin at 1.55 Å resolution. *J. Mol. Biol.* **291**, 899–911 (1999).
- 682 42. Berndt, A., Yizhar, O., Gunaydin, L. A., Hegemann, P. & Deisseroth, K. Bi-stable neural state  
683 switches. *Nat. Neurosci.* **12**, 229–234 (2009).
- 684 43. Bamann, C., Gueta, R., Kleinlogel, S., Nagel, G. & Bamberg, E. Structural Guidance of the  
685 Photocycle of Channelrhodopsin-2 by an Interhelical Hydrogen Bond. *Biochemistry* **49**, 267–  
686 278 (2010).
- 687 44. Sineshchekov, O. A., Li, H., Govorunova, E. G. & Spudich, J. L. Photochemical reaction cycle  
688 transitions during anion channelrhodopsin gating. *Proc. Natl. Acad. Sci.* **113**, E1993–E2000  
689 (2016).
- 690 45. Bamann, C., Kirsch, T., Nagel, G. & Bamberg, E. Spectral Characteristics of the Photocycle  
691 of Channelrhodopsin-2 and Its Implication for Channel Function. *J. Mol. Biol.* **375**, 686–694  
692 (2008).
- 693 46. Lórenz-Fonfría, V. A. *et al.* Temporal evolution of helix hydration in a light-gated ion channel  
694 correlates with ion conductance. *Proc. Natl. Acad. Sci.* **112**, E5796–E5804 (2015).
- 695 47. Li, H. *et al.* Crystal structure of a natural light-gated anion channelrhodopsin. *eLife* **8**, 1–17  
696 (2019).
- 697 48. Schreckenbach, T., Walckhoff, B. & Oesterhelt, D. Specificity of the Retinal Binding Site of  
698 Bacteriorhodopsin: Chemical and Stereochemical Requirements for the Binding of Retinol and  
699 Retinal. *Biochemistry* **17**, 5353–5359 (1978).

- 700 49. Bruun, S. *et al.* The chromophore structure of the long-lived intermediate of the C128T  
701 channelrhodopsin-2 variant. *FEBS Lett.* **585**, 3998–4001 (2011).
- 702 50. Oesterhelt, D. & Stoeckenius, W. Isolation of the Cell Membrane of Halobacterium halobium  
703 and Its Fractionation into red and Purple Membrane. in *Methods in Enzymology* **31**, 667–678  
704 (1974).
- 705 51. Lozier, R. H. & Niederberger, W. The photochemical cycle of bacteriorhodopsin. *Fed. Proc.*  
706 **36**, 1805–9 (1977).
- 707 52. Govorunova, E. G., Cunha, S. R., Sineshchekov, O. A. & Spudich, J. L. Anion  
708 channelrhodopsins for inhibitory cardiac optogenetics. *Sci. Rep.* **6**, 33530 (2016).
- 709 53. Yi, A., Mamaeva, N., Li, H., Spudich, J. L. & Rothschild, K. J. Resonance Raman Study of an  
710 Anion Channelrhodopsin: Effects of Mutations near the Retinylidene Schiff Base. *Biochemistry*  
711 **55**, 2371–2380 (2016).
- 712 54. Camacho, C. *et al.* BLAST+: architecture and applications. *BMC Bioinformatics* **10**, 421  
713 (2009).
- 714 55. Sunagawa, S. *et al.* Structure and function of the global ocean microbiome. *Science* **348**,  
715 1261359–1261359 (2015).
- 716 56. Brum, J. R. *et al.* Patterns and ecological drivers of ocean viral communities. *Science* **348**,  
717 1261498–1261498 (2015).
- 718 57. Hingamp, P. *et al.* Exploring nucleo-cytoplasmic large DNA viruses in Tara Oceans microbial  
719 metagenomes. *ISME J.* **7**, 1678–1695 (2013).
- 720 58. Filosof, A. *et al.* Novel Abundant Oceanic Viruses of Uncultured Marine Group II  
721 Euryarchaeota. *Curr. Biol.* **27**, 1362–1368 (2017).
- 722 59. Villar, E. *et al.* The Ocean Gene Atlas: exploring the biogeography of plankton genes online.  
723 *Nucleic Acids Res.* **46**, W289–W295 (2018).



- 724 60. Katoh, K., Rozewicki, J. & Yamada, K. D. MAFFT online service: multiple sequence alignment,  
725 interactive sequence choice and visualization. *Brief. Bioinform.* 1–7 (2017).  
726 doi:10.1093/bib/bbx108
- 727 61. Finn, R. D., Clements, J. & Eddy, S. R. HMMER web server: interactive sequence similarity  
728 searching. *Nucleic Acids Res.* **39**, W29–W37 (2011).
- 729 62. Becker, R. A., Wilks, A. R., Brownrigg, R., Minka, T. P. & Deckmyn, A. Maps: Draw  
730 Geographical Maps. (2017). Available at: <https://cran.r-project.org/package=maps>.
- 731 63. Wickham, H. *ggplot2*. (2009). doi:10.1007/978-0-387-98141-3
- 732 64. Rudis, B., Bolker, B., Marwick, B., Schulz, J. & Matev, R. ggalt: Extra Coordinate Systems,  
733 ‘Geoms’, Statistical Transformations, Scales and Fonts for ‘ggplot2’. (2017). Available at:  
734 <https://cran.r-project.org/package=ggalt>.
- 735 65. Dereeper, A. *et al.* Phylogeny.fr: robust phylogenetic analysis for the non-specialist. *Nucleic*  
736 *Acids Res.* **36**, 465–9 (2008).
- 737 66. Larkin, M. A. *et al.* Clustal W and Clustal X version 2.0. *Bioinforma. Oxf. Engl.* **23**, 2947–2948  
738 (2007).
- 739 67. Robert, X. & Gouet, P. Deciphering key features in protein structures with the new ENDscript  
740 server. *Nucleic Acids Res.* **42**, W320–W324 (2014).
- 741 68. Gibson, D. G. *et al.* Enzymatic assembly of DNA molecules up to several hundred kilobases.  
742 doi:10.1038/NMETH.1318
- 743 69. Grimm, C., Vierock, J., Hegemann, P. & Wietek, J. Whole-cell Patch-clamp Recordings for  
744 Electrophysiological Determination of Ion Selectivity in Channelrhodopsins. *J. Vis. Exp.*  
745 (2017). doi:10.3791/55497
- 746 70. Grimm, C. *et al.* Electrical properties, substrate specificity and optogenetic potential of the  
747 engineered light- driven sodium pump eKR2. doi:10.1038/s41598-018-27690-w
- 748 71. Waterhouse, A. *et al.* SWISS-MODEL: homology modelling of protein structures and  
749 complexes. *Nucleic Acids Res.* **46**, W296–W303 (2018).

- 750 72. Jo, S., Kim, T., Iyer, V. G. & Im, W. CHARMM-GUI: A web-based graphical user interface for  
751 CHARMM. *J. Comput. Chem.* **29**, 1859–1865 (2008).
- 752 73. MacKerell, A. D. *et al.* All-Atom Empirical Potential for Molecular Modeling and Dynamics  
753 Studies of Proteins. *J. Phys. Chem. B* **102**, 3586–3616 (1998).
- 754 74. Baker, N. A., Sept, D., Joseph, S., Holst, M. J. & McCammon, J. A. Electrostatics of  
755 nanosystems: Application to microtubules and the ribosome. *Proc. Natl. Acad. Sci.* **98**, 10037–  
756 10041 (2001).
- 757 75. Kieseritzky, G. & Knapp, E.-W. Optimizing pKa computation in proteins with pH adapted  
758 conformations. *Proteins Struct. Funct. Bioinforma.* **71**, 1335–1348 (2007).
- 759 76. Meyer, T. & Knapp, E.-W. pKa Values in Proteins Determined by Electrostatics Applied to  
760 Molecular Dynamics Trajectories. *J. Chem. Theory Comput.* **11**, 2827–2840 (2015).
- 761 77. Gee, C. E., Ohmert, I., Wiegert, J. S. & Oertner, T. G. Preparation of Slice Cultures from  
762 Rodent Hippocampus. 126–131 (2017). doi:10.1101/pdb.prot094888
- 763 78. Wiegert, J. S., Gee, C. E. & Oertner, T. G. Single-Cell Electroporation of Neurons. 135–139  
764 (2017). doi:10.1101/pdb.prot094904
- 765 79. Mullen, K. M. & van Stokkum, I. H. M. TIMP: An R Package for Modeling Multi-way  
766 Spectroscopic Measurements. *J. Stat. Softw.* **18**, (2007).
- 767 80. Snellenburg, J. J., Laptенок, S. P., Seger, R., Mullen, K. M. & van Stokkum, I. H. M. Glotaran:  
768 A Java-Based Graphical User Interface for the R Package TIMP. *J. Stat. Softw.* **49**, 1–22  
769 (2012).
- 770 81. Toh, K. C., Stojkovic, E. A., van Stokkum, I. H. M., Moffat, K. & Kennis, J. T. M. Proton-transfer  
771 and hydrogen-bond interactions determine fluorescence quantum yield and photochemical  
772 efficiency of bacteriophytochrome. *Proc. Natl. Acad. Sci.* **107**, 9170–9175 (2010).
- 773 82. Elgeti, M., Ritter, E. & Bartl, F. J. New Insights into Light-Induced Deactivation of Active  
774 Rhodopsin by SVD and Global Analysis of Time-Resolved UV/Vis- and FTIR-Data. *Z. Für*  
775 *Phys. Chem.* **222**, 1117–1129 (2008).

- 776 83. Henry, E. R. & Hofrichter, J. Singular value decomposition: Application to analysis of  
777 experimental data. in *Methods in Enzymology* **210**, 129–192 (1992).
- 778 84. Humphrey, W., Dalke, A. & Schulten, K. VMD: Visual Molecular Dynamics. *J. Mol. Graph.* **14**,  
779 33–38 (1996).
- 780 85. Ho, J., Tumkaya, T., Aryal, S., Choi, H. & Claridge-Chang, A. Moving beyond P values:  
781 Everyday data analysis with estimation plots. *bioRxiv* **6**, 377978 (2018).
- 782 86. Pinhassi, J., DeLong, E. F., Bèjà, O., González, J. M. & Pedrós-Alió, C. Marine Bacterial and  
783 Archaeal Ion-Pumping Rhodopsins: Genetic Diversity, Physiology, and Ecology. *Microbiol.*  
784 *Mol. Biol. Rev.* **80**, 929–954 (2016).

785

## 786 **Acknowledgments**

787 We thank T. Tharmalingam, S. Augustin, M. Reh, M. Meiworm, K. Sauter, und S. Schillemeit for  
788 excellent technical assistance. We thank S. P. Tsunoda and H. Kandori for sharing the *GtCCR4*  
789 plasmid and Itai Sharon for initial *Tara* Ocean assemblies. This work was supported by the  
790 Deutsche Forschungsgemeinschaft (DFG; German Research Foundation): SFB 1078 to P.He. (B1,  
791 B2), F.B. (B5), and P.Hi. (B6), the Germany's Excellence Strategy – EXC 2008/1 (UniSysCat) –  
792 390540038 to P.Hi. & P.He., and the priority program SPP 1926 & FOR 2419 to J.S.W. This work  
793 was also supported by the European Research Council (ERC): advanced grant (LS1, ERC-2015-  
794 AdG) to P.He. and starting grant (LS5, ERC-2016-STG) to J.S.W. P.He. is a Hertie Senior  
795 Professor for Neuroscience supported by the Hertie Foundation. O.B. is supported by the Louis  
796 and Lyra Richmond Memorial Chair in Life Sciences.

## 797 **Author Contributions**

798 J.W., J.O., and P.He. designed the project, with contributions from all authors. J.F.-U., E.P., I.S.,  
799 O.B., J.W., and J.O. performed computational work. J.O., B.L., S.R-R., P.F., A.S., A.K., and J.V.

800 conducted the experiments, with assistance from M.B. and M.L. Experimental data were analyzed  
801 by J.O., J.W., B.L., S.R-R., P.F., A.S., and A.K. and interpreted by all authors. J.W., J.O., and  
802 P.He. wrote the manuscript, with contributions from all authors.

### 803 **Competing Interests**

804 The authors declare no competing interests.
